# Supplementary material
Source: Royal Society of Chemistry journal article supplement (doi:10.1039/d6cc01182a)

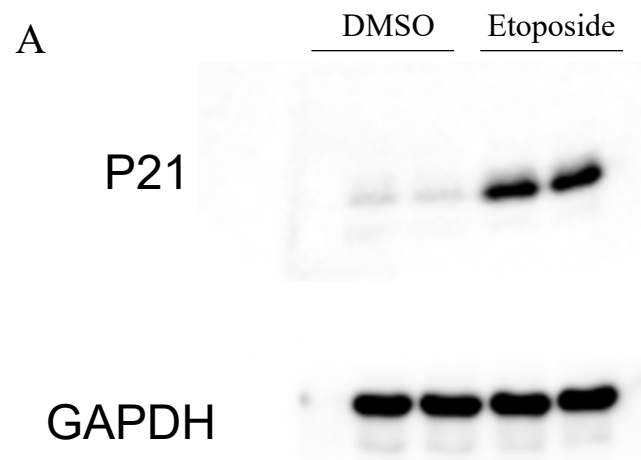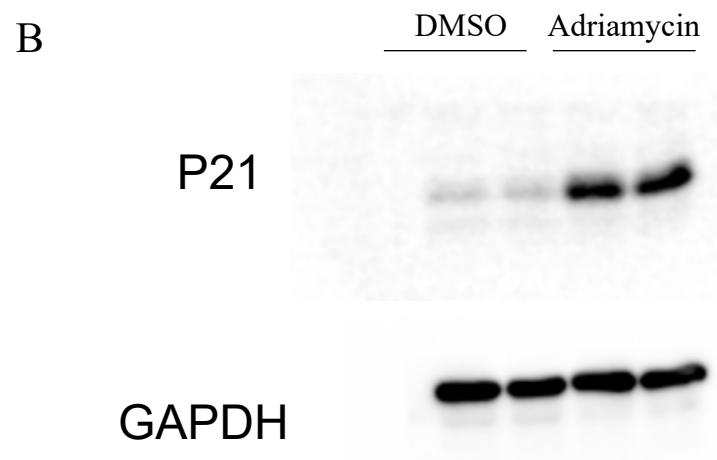

Supplement: d6cc01182a1.pdf [file d6cc01182a1.pdf]
